# Supplementary material
Source: Research Square preprint supplement (doi:10.21203/rs.3.rs-9665625/v1)
Supplement: Supplementary file 1 [file 4234b22ae23cfbe6b9051e85.docx]

# Supplementary Materials

*Supplementary Table S1*

Country-Level PISA Mathematics and Teacher Support: 2012, 2022, and Change Scores (N = 59 Countries)

| **Country** | **ISO3** | **OECD** | **Math 2012** | **Math 2022** | **ΔMath** | **TS 2012** | **TS 2022** | **ΔTS** |
| --- | --- | --- | --- | --- | --- | --- | --- | --- |
| Australia | AUS | Y | 504.05 | 487.14 | −16.91 | 0.25 | 0.06 | −0.19 |
| Austria | AUT | Y | 505.66 | 487.28 | −18.38 | 0.13 | 0.29 | 0.16 |
| Belgium | BEL | Y | 514.81 | 489.29 | −25.52 | 0.10 | 0.05 | −0.05 |
| Canada | CAN | Y | 517.99 | 497.05 | −20.94 | 0.08 | -0.10 | −0.18 |
| Chile | CHL | Y | 423.01 | 411.94 | −11.07 | 0.22 | 0.08 | −0.14 |
| Colombia | COL | Y | 376.04 | 383.23 | 7.19 | −0.02 | 0.20 | 0.22 |
| Czech Republic | CZE | Y | 499.49 | 487.67 | −11.82 | 0.07 | -0.10 | −0.17 |
| Denmark | DNK | Y | 499.99 | 489.24 | −10.75 | 0.04 | -0.09 | −0.13 |
| Estonia | EST | Y | 521.61 | 510.44 | −11.17 | 0.12 | -0.10 | −0.22 |
| Finland | FIN | Y | 519.18 | 484.27 | −34.91 | 0.15 | -0.09 | −0.24 |
| France | FRA | Y | 494.96 | 474.05 | −20.91 | 0.10 | 0.00 | −0.10 |
| Germany | DEU | Y | 513.85 | 475.19 | −38.66 | 0.08 | 0.30 | 0.22 |
| Greece | GRC | Y | 453.44 | 424.87 | −28.57 | 0.21 | -0.23 | −0.44 |
| Hungary | HUN | Y | 477.04 | 475.47 | −1.57 | 0.07 | 0.09 | 0.02 |
| Iceland | ISL | Y | 492.80 | 459.40 | −33.40 | 0.14 | -0.12 | −0.26 |
| Ireland | IRL | Y | 501.52 | 492.31 | −9.21 | 0.08 | 0.00 | −0.08 |
| Israel | ISR | Y | 466.17 | 468.47 | 2.30 | 0.07 | 0.22 | 0.15 |
| Italy | ITA | Y | 485.33 | 471.15 | −14.18 | 0.07 | 0.00 | −0.07 |
| Japan | JPN | Y | 536.56 | 536.22 | −0.34 | −0.13 | 0.25 | 0.38 |
| Korea | KOR | Y | 554.22 | 526.81 | −27.41 | −0.13 | 0.14 | 0.27 |
| Latvia | LVA | Y | 491.26 | 483.19 | −8.07 | 0.17 | -0.04 | −0.21 |
| Lithuania | LTU | Y | 479.32 | 475.31 | −4.01 | 0.14 | -0.12 | −0.26 |
| Luxembourg | LUX | Y | 490.01 | 483.21 | −6.80 | 0.11 | 0.04 | −0.07 |
| Mexico | MEX | Y | 413.34 | 395.08 | −18.26 | 0.23 | 0.09 | −0.14 |
| Netherlands | NLD | Y | 523.13 | 493.75 | −29.38 | 0.02 | 0.00 | −0.02 |
| New Zealand | NZL | Y | 499.99 | 478.78 | −21.21 | 0.14 | -0.06 | −0.20 |
| Norway | NOR | Y | 489.35 | 456.46 | −32.89 | 0.09 | -0.16 | −0.25 |
| Poland | POL | Y | 518.17 | 489.30 | −28.87 | 0.19 | -0.32 | −0.51 |
| Portugal | PRT | Y | 487.05 | 472.12 | −14.93 | 0.13 | -0.02 | −0.15 |
| Slovak Republic | SVK | Y | 482.25 | 473.44 | −8.81 | 0.10 | 0.00 | −0.10 |
| Slovenia | SVN | Y | 501.11 | 485.18 | −15.93 | 0.09 | -0.09 | −0.18 |
| Spain | ESP | Y | 484.30 | 473.74 | −10.56 | 0.08 | 0.01 | −0.07 |
| Sweden | SWE | Y | 478.15 | 487.35 | 9.20 | 0.07 | 0.01 | −0.06 |
| Switzerland | CHE | Y | 530.97 | 508.34 | −22.63 | 0.08 | 0.07 | −0.01 |
| Turkey | TUR | Y | 420.67 | 453.18 | 32.51 | 0.19 | -0.24 | −0.43 |
| United Kingdom | GBR | Y | 494.23 | 489.29 | −4.94 | 0.12 | 0.01 | −0.11 |
| United States | USA | Y | 481.13 | 465.44 | −15.69 | 0.09 | -0.06 | −0.15 |
| Brazil | BRA | N | 391.42 | 379.27 | −12.15 | 0.34 | 0.10 | −0.24 |
| Bulgaria | BGR | N | 439.43 | 415.07 | −24.36 | 0.20 | 0.01 | −0.19 |
| Croatia | HRV | N | 471.21 | 463.89 | −7.32 | 0.10 | 0.02 | −0.08 |
| Hong Kong | HKG | N | 561.22 | 540.09 | −21.13 | −0.19 | -0.18 | 0.01 |
| Jordan | JOR | N | 386.43 | 361.27 | −25.16 | 0.42 | 0.11 | −0.31 |
| Macao | MAC | N | 538.04 | 552.49 | 14.45 | −0.08 | -0.12 | −0.04 |
| Malaysia | MYS | N | 421.04 | 409.50 | −11.54 | 0.18 | 0.07 | −0.11 |
| Moldova | MDA | N | 420.31 | 428.29 | 7.98 | 0.19 | -0.14 | −0.33 |
| Montenegro | MNE | N | 410.22 | 406.45 | −3.77 | 0.21 | 0.03 | −0.18 |
| North Macedonia | MKD | N | 384.29 | 384.70 | 0.41 | 0.23 | 0.02 | −0.21 |
| Peru | PER | N | 368.47 | 391.16 | 22.69 | 0.20 | 0.09 | −0.11 |
| Qatar | QAT | N | 376.08 | 414.38 | 38.30 | 0.25 | 0.13 | −0.12 |
| Romania | ROU | N | 445.12 | 428.72 | −16.40 | 0.24 | 0.06 | −0.18 |
| Serbia | SRB | N | 449.37 | 440.05 | −9.32 | 0.19 | 0.04 | −0.15 |
| Singapore | SGP | N | 573.46 | 575.46 | 2.00 | −0.27 | -0.17 | 0.10 |
| Taiwan | TWN | N | 560.77 | 547.03 | −13.74 | −0.07 | -0.01 | 0.06 |
| Thailand | THA | N | 427.18 | 394.29 | −32.89 | 0.30 | 0.11 | −0.19 |
| Tunisia | TUN | N | 388.55 | 374.08 | −14.47 | 0.38 | 0.13 | −0.25 |
| United Arab Emirs. | ARE | N | 434.18 | 431.56 | −2.62 | 0.17 | 0.08 | −0.09 |
| Uruguay | URY | N | 409.38 | 396.34 | −13.04 | 0.21 | 0.10 | −0.11 |
| Vietnam | VNM | N | 511.47 | 469.50 | −41.97 | −0.05 | 0.10 | 0.15 |

*Note.* Math 2012 and Math 2022 = country-level weighted mean PISA mathematics score (score points). ΔMath = Math 2022 − Math 2012. TS 2012 and TS 2022 = weighted mean TEACHSUP index (OECD-standardised). ΔTS = TS 2022 − TS 2012. Countries are sorted within OECD and non-OECD groups alphabetically. Note that Turkey's ΔMath value of +32.5 is verified from the PISA 2012 and 2022 database files and reflects genuine score improvement. OECD = OECD member at time of analysis (Y = yes, N = no). Country data are approximate country means; exact values may differ slightly due to weighting procedures.
